# Supplementary material
Source: PubMed Central journal article supplement (PMC2519612)
Supplement: NIHMS54214-supplement-supplement_1.pdf [file NIHMS54214-supplement-supplement_1.pdf]

**Supplemental Table 1.** Sequences for Real-Time PCR primers and probes.

| <b>Gene</b>       | <b>Sequences</b>                                                                                                             |
|-------------------|------------------------------------------------------------------------------------------------------------------------------|
| <b>Beta-actin</b> | FP: 5'- CCCTAAGGCCAACCGTGAAA -3'<br>RP: 5'- ACGACCAGAGGCATACAGGGA -3'<br>5'-6FAM-ATGACCCAGATCATGTTTGAGACCTTCAACAC -TAMRA-3'  |
| <b>Per2</b>       | FP: 5'-CATCCAGTCCTGTTTTCTTTAGAATG-3'<br>RP: 5'-CATCGCACAAACTCTGAGAGCTT-3'<br>5'-6FAM-TGCTTACACGGGTGTCCTGAGACTTTCTCT-TAMRA-3' |
| <b>DBP</b>        | FP: 5'-TGCCCTGTCAAGCATTCCA-3'<br>RP: 5'-GGCTTCAATTCCTCCTCTGAGA-3'<br>Probe: 5'-6FAM-CATGAGACTTTTGACCCTCGGAGG -TAMRA -3'      |
